# Supplementary material
Source: PubMed Central journal article supplement (PMC526468)
Supplement: 7600453s1.pdf [file 7600453s1.pdf]

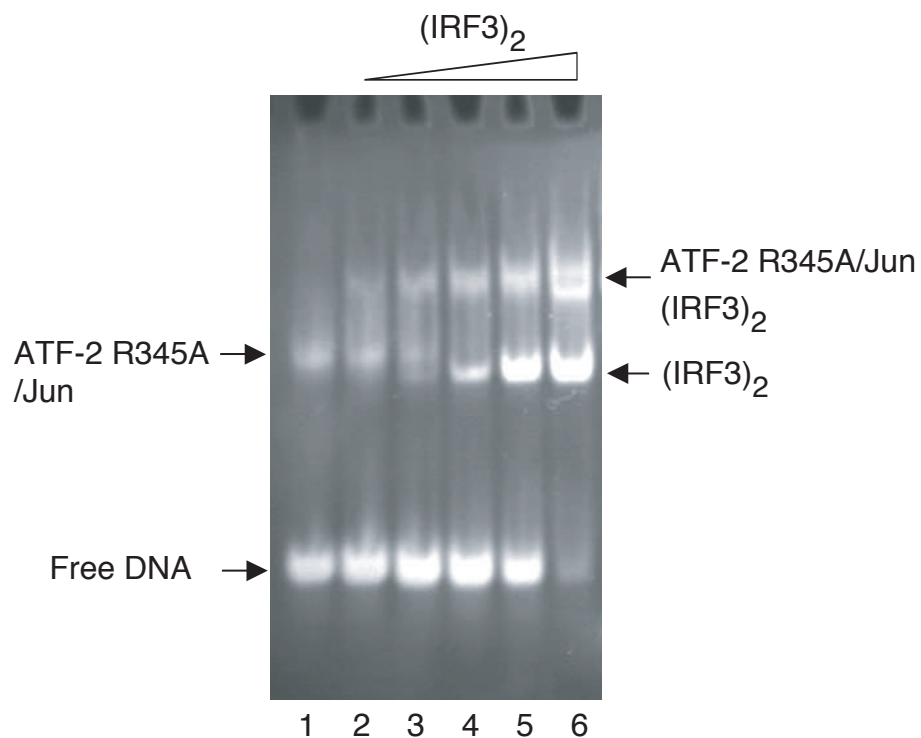

Figure S1: Electrophoretic mobility shift assay showing binding of mutant ATF-2 R345A/c-Jun and IRF-3 dimer binding to the 31mer DNA duplex used for crystallization. 20  $\mu\text{M}$  ATF-2 R345A/c-Jun heterodimer was preincubated with 20  $\mu\text{M}$  substrate DNA for 10 minutes before addition of increasing concentrations of IRF-3 dimer (lanes 2-6). IRF-3 dimer concentrations were 0  $\mu\text{M}$  (lane 1), 1.8  $\mu\text{M}$  (lanes 2), 3.8  $\mu\text{M}$  (lane 3), 7.5  $\mu\text{M}$  (lane 4), 15  $\mu\text{M}$  (lane 5), 30  $\mu\text{M}$  (lane 6). Binding of the mutant ATF-2 R345A is similar to wild-type ATF-2 (Figure 4). Note that binding at the highest IRF-3 dimer concentrations, an extra band probably corresponding to binding of a second IRF-3 dimer appears (lanes 6).
